# Supplementary material
Source: ML conference proceedings conference paper supplement (https://proceedings.neurips.cc/paper_files/paper/2021/hash/3c8a49145944fed2bbcaade178a426c4-Abstract.html)
Supplement: Supplementary file 1 [file 3c8a49145944fed2bbcaade178a426c4-Supplemental.pdf]

---

# SOAT: A Scene- and Object-Aware Transformer for Vision-and-Language Navigation

---

Abhinav Moudgil<sup>1\*</sup>, Arjun Majumdar<sup>1</sup>, Harsh Agrawal<sup>1</sup>, Stefan Lee<sup>2</sup>, Dhruv Batra<sup>1</sup>

<sup>1</sup> Georgia Institute of Technology, <sup>2</sup> Oregon State University

## A Appendix

### A.1 Limitations

We propose an approach which exploits object features in addition to scene features for vision-and-language navigation (VLN). Our approach is able to utilize object features for better visiolinguistic alignment (see Section 5) despite the domain gap between the images used to train the object detector and VLN data. Specifically, object features are obtained using a Faster R-CNN detector [1] trained on photos from web (Visual Genome [2]), in which objects are typically well framed by the photographer. On the other hand, the VLN datasets used in our experiments contain panoramic images from indoor house scans that capture objects at viewing angles determined by the navigation path. The gap between these two types of data could be eliminated by either fine-tuning or training detector directly on indoor scenes. This domain gap is also present during pretraining. Our approach uses an OSCAR model [3] that was pretrained on image and text pairs from the internet. An additional pretraining stage on VLN data (e.g., by adapting the pretraining techniques proposed in [4]) may further improve performance, and is an interesting direction for future work. Finally, we test our approach on English instructions from RxR. However, future work might explore how to extend our approach for the multi-lingual setting.

### A.2 Broader Impact

We propose a new model with better vision-and-language navigation performance in indoor environments. This work is a step towards building AI agents which can follow natural language instructions from humans and act accordingly. These AI agents could be deployed in home and commercial environments to provide assistance. However, since these agents are trained using the path-instruction pairs from VLN datasets, they encode all the visual and language biases that are present in the data (e.g., types of houses, objects, language usage, etc). Hence, significant attention should be paid before deployment of these agents in the real-world.

### A.3 Performance for Multiple Random Seeds

We report results with 3 random seeds of our approach and VLN $\odot$ BERT baseline in Table 1 on R2R dataset [5]. We report the mean and standard error for each metric. Overall, our approach improves SPL by  $\sim 1\%$  which is consistent with the reported results in the main draft.

### A.4 Additional Analysis of Selective Object Attention

In Table 2 we report results (on R2R) for alternatives to the selective object attention mask proposed in this work. Specifically, we vary which inputs only serve as keys and values and which serve as queries, keys, and values in the multimodal transformer. Results for our model with selective object attention are presented in row 5. The alternative of performing selective *scene* attention

---

\*Correspondence to abhinavmoudgil195@gmail.com

Table 1: Results with 3 random seeds.

|        |                      | R2R Val Unseen   |                 |                  |                  |
|--------|----------------------|------------------|-----------------|------------------|------------------|
| Models |                      | TL               | NE ↓            | SR ↑             | SPL ↑            |
| 1      | VLN $\odot$ BERT [6] | 11.76 $\pm$ 0.29 | 4.44 $\pm$ 0.04 | 57.37 $\pm$ 0.69 | 52.30 $\pm$ 0.33 |
| 2      | Ours                 | 11.25 $\pm$ 0.08 | 4.32 $\pm$ 0.06 | 58.01 $\pm$ 0.39 | 53.37 $\pm$ 0.33 |

(row 2) underperforms our approach. Similarly, as discussed in Section 5, the performance of our model without selective object attention (row 3) is comparable to the VLN $\odot$ BERT baseline. Row 4 reports results of only using object features for the visual inputs, which leads to substantially lower performance than our approach of using scene and object features. Since our approach (row 5) is closely aligned with pretraining setup, it is able to utilize both object- and scene-level visual cues to outperform all of these alternatives.

Table 2: R2R attention ablations.

|        |                  | Val Seen                     |                           |       |      |       |       | Val Unseen   |             |              |              |
|--------|------------------|------------------------------|---------------------------|-------|------|-------|-------|--------------|-------------|--------------|--------------|
| Models |                  | Input Tokens                 | Query Tokens              | TL    | NE ↓ | SR ↑  | SPL ↑ | TL           | NE ↓        | SR ↑         | SPL ↑        |
| 1      | Baseline [6]     | $\langle s, X, V \rangle$    | $\langle s, V \rangle$    | 11.02 | 3.11 | 69.93 | 65.65 | 12.16        | 4.40        | 57.90        | 51.43        |
| 2      | Scene attention  | $\langle s, X, V, O \rangle$ | $\langle s, V \rangle$    | 11.08 | 3.35 | 68.95 | 64.48 | 12.68        | 4.42        | 56.83        | 50.99        |
| 3      | All attention    | $\langle s, X, V, O \rangle$ | $\langle s, V, O \rangle$ | 11.12 | 3.24 | 70.03 | 66.59 | 12.05        | 4.34        | 57.85        | 51.73        |
| 4      | Object attention | $\langle s, X, O \rangle$    | $\langle s, O \rangle$    | 11.65 | 4.26 | 57.49 | 53.52 | 12.24        | 4.91        | 52.45        | 46.75        |
| 5      | Ours             | $\langle s, X, V, O \rangle$ | $\langle s, O \rangle$    | 11.81 | 3.63 | 62.78 | 58.01 | <b>12.15</b> | <b>4.28</b> | <b>58.71</b> | <b>53.24</b> |

### A.5 Exhaustive Ablations over Proposed Modules

Our proposed method consists of three modules: (1) object features (2) view aggregation and (3) selective attention. In Table 3, we provide results for all the possible combinations of these three modules. Some combinations of object features, view aggregation, and selective attention are not meaningfully defined. Specifically, view aggregation defines how object features and scene features are combined – without object features there is nothing to combine. We find that our architectural changes (i.e. view aggregation and selective attention) work best in the presence of object features, and that combining all three ideas (row 8) outperforms the other variations.

Table 3: Additional ablations over proposed modules on R2R.

| Models |          | Object Features | View Aggregation | Selective Attention | Val Unseen   |              |
|--------|----------|-----------------|------------------|---------------------|--------------|--------------|
|        |          |                 |                  |                     | SR ↑         | SPL ↑        |
| 1      | Baseline |                 |                  |                     | 57.90        | 51.43        |
| 2      |          | ✓               |                  |                     | 57.26        | 50.96        |
| 3      |          |                 | ✓                |                     | -            | -            |
| 4      |          |                 |                  | ✓                   | 57.60        | 52.06        |
| 5      |          | ✓               | ✓                |                     | 57.85        | 51.73        |
| 6      |          | ✓               |                  | ✓                   | 57.73        | 52.46        |
| 7      |          |                 | ✓                | ✓                   | -            | -            |
| 8      | Ours     | ✓               | ✓                | ✓                   | <b>58.71</b> | <b>53.24</b> |

### A.6 Evaluation Metrics

We describe metrics used in this work below:

- Trajectory Length (TL) measures the average length of agent’s trajectory in meters.

- Navigation Error (NE) is the average shortest geodesic distance (in meters) between agent’s final location and goal location.
- Success Rate (SR) reports percentage of instructions for which agent’s navigation error is less than a threshold. We use threshold of 3 meters for success which is consistent with prior work [5, 7].
- Success weighted by Path Length (SPL) captures the efficiency of agent in reaching goal location. It is obtained by weighing success (1 or 0) by normalized inverse path length factor which is shortest path length divided by maximum of agent’s path length or shortest path length.
- Normalized Dynamic Time Warping (NDTW) metric explicitly measures path adherence by softly penalizing deviations from reference path. SDTW provides a “success” analogue to NDTW by multiplying it with success factor (1 or 0) based on distance threshold of 3 meters. We refer the reader to [8] for a detailed discussion on these metrics.

### A.7 VLN $\odot$ BERT State Refinement

As discussed in Section 3.3, in VLN $\odot$ BERT [6] state history is maintained through the state token  $s_t$ . Specifically, the next state token  $s_{t+1}$  is calculated using the output representation of the state token  $\psi(s_t)$ , which is refined using the following procedure.

Recall that state-conditioned attention scores over the visual scene features  $\alpha(\mathbf{V}_t)$  (see Section 3.3) are normalized with the softmax function as  $\tilde{\alpha}(\mathbf{V}_t) = \text{softmax}(\alpha(\mathbf{V}_t))$ . These normalized scores are used as next-action probabilities and used to calculate the weighted sum of the scene features  $\mathbf{F}^v = \tilde{\alpha}(\mathbf{V}_t)\mathbf{V}_t$ .

Similarly, state-conditioned attention scores over the word tokens  $\psi(\mathbf{I})$  are calculated as

$$\alpha(\psi(\mathbf{I})) = \frac{\psi(s_t)\psi(\mathbf{I})^T}{\sqrt{d}} \quad (1)$$

and normalized as  $\tilde{\alpha}(\psi(\mathbf{I})) = \text{softmax}(\alpha(\psi(\mathbf{I})))$ , where  $d$  is the model’s hidden dimension size. These linguistic scores are used to calculate the weighted sum of word tokens  $\mathbf{F}^l = \tilde{\alpha}(\psi(\mathbf{I}))\psi(\mathbf{V}_t)$ .

Finally, the next state token is calculated as

$$s_{t+1} = \left[ [s_t; \mathbf{F}^v \odot \mathbf{F}^l] \mathbf{W}_1; \mathbf{a}_t \right] \mathbf{W}_2 \quad (2)$$

where  $\mathbf{W}_1$  and  $\mathbf{W}_2$  are learned weight matrices,  $\odot$  represents an element-wise product,  $[\cdot; \cdot]$  represents concatenation, and  $\mathbf{a}_t$  are directional features for the selected action. Intuitively, this state update procedure aggregates scene, language, and action information into the state history.

### A.8 Qualitative results

In the attached supplemental videos, we visualize a few trajectories from RxR val-unseen split of success and failure cases of our approach along with VLN $\odot$ BERT baseline [6]. In each trajectory, we plot panoramic view which is passed as input to the agent and the action which agent takes with an arrow at the bottom. We highlight success with a green box when the agent reaches goal and failure case with a red box.

## References

- [1] Shaoqing Ren, Kaiming He, Ross Girshick, and Jian Sun. Faster R-CNN: Towards real-time object detection with region proposal networks. In *NeurIPS*, 2015.
- [2] Ranjay Krishna, Yuke Zhu, Oliver Groth, Justin Johnson, Kenji Hata, Joshua Kravitz, Stephanie Chen, Yannis Kalantidis, Li-Jia Li, David A Shamma, et al. Visual genome: Connecting language and vision using crowdsourced dense image annotations. *IJCV*, 2017.
- [3] Xijun Li, Xi Yin, C. Li, X. Hu, Pengchuan Zhang, Lei Zhang, Longguang Wang, H. Hu, Li Dong, Furu Wei, Yejin Choi, and Jianfeng Gao. Oscar: Object-semantics aligned pre-training for vision-language tasks. In *ECCV*, 2020.
- [4] Weituo Hao, Chunyuan Li, Xijun Li, Lawrence Carin, and Jianfeng Gao. Towards learning a generic agent for vision-and-language navigation via pre-training. In *CVPR*, 2020.

- [5] Peter Anderson, Qi Wu, Damien Teney, Jake Bruce, Mark Johnson, Niko Sünderhauf, Ian Reid, Stephen Gould, and Anton van den Hengel. Vision-and-language navigation: Interpreting visually-grounded navigation instructions in real environments. In *CVPR*, 2018.
- [6] Yicong Hong, Qi Wu, Yuankai Qi, Cristian Rodriguez-Opazo, and Stephen Gould. A recurrent vision-and-language bert for navigation, 2020.
- [7] Peter Anderson, Angel Chang, Devendra Singh Chaplot, Alexey Dosovitskiy, Saurabh Gupta, Vladlen Koltun, Jana Kosecka, Jitendra Malik, Roozbeh Mottaghi, Manolis Savva, and Amir R. Zamir. On evaluation of embodied navigation agents, 2018.
- [8] Gabriel Magalhaes, Vihan Jain, Alexander Ku, Eugene Ie, and Jason Baldridge. Effective and general evaluation for instruction conditioned navigation using dynamic time warping. *arXiv preprint arXiv:1907.05446*, 2019.
